# Supplementary material for: Fabrication of a flexible UV photodetector and disposable photoresponsive uric acid sensor by direct writing of ZnO pencil on paper
Source: Royal Society of Chemistry journal article supplement (doi:10.1039/c7tc03292g), 2017-01-01
Supplement: c7tc03292g1.pdf [file c7tc03292g1.pdf]

## **Direct writing of ZnO pencil on paper based flexible UV photodetector and disposable Photoresponsive Uric Acid sensor**

Veerla Raja Sekhar<sup>1</sup>, Parikshit Sahatiya<sup>1</sup> and Sushmee Badhulika<sup>1\*</sup>

<sup>1</sup>*Department of Electrical Engineering, Indian Institute of Technology, Hyderabad,  
502285, India.*

*\*Corresponding author: E-mail: sbadh@iith.ac.in; Telephone: +040-23018443*

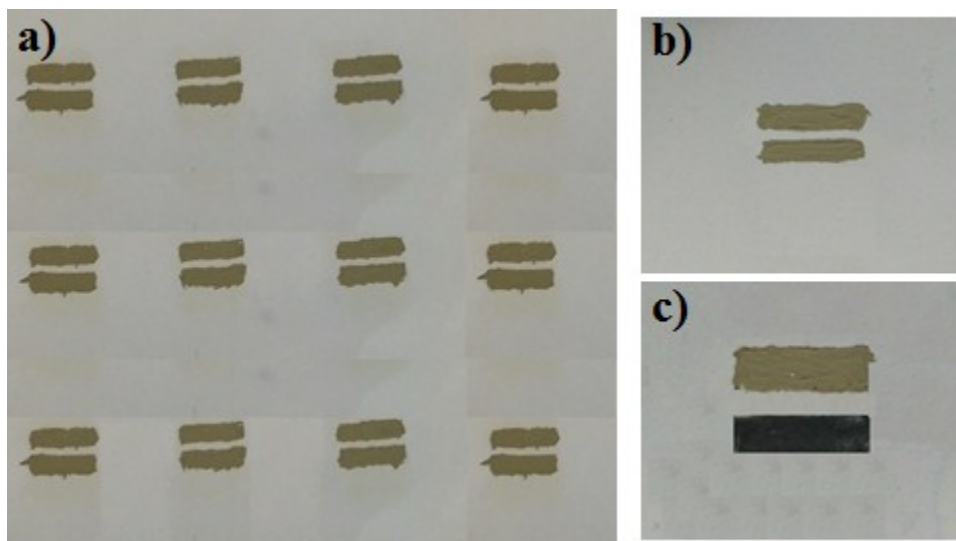

Figure S1: a) Real photograph of the array of the devices fabricated on cellulose paper b) Single device with silver past contacts c) Single device with Graphene contact

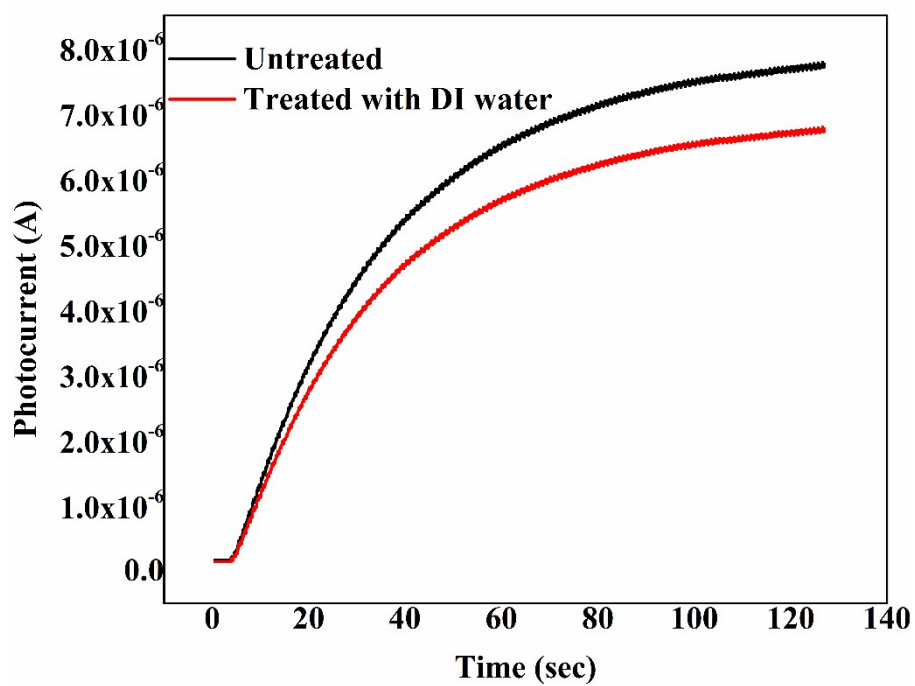

Figure S2: Photoresponse of ZnO traces with untreated and DI water treated wherein a small decrement in photocurrent is observed after treating with DI water.
